# Supplementary material
Source: MDPI journal article supplement (https://www.mdpi.com/2073-4441/15/6/1226)
Supplement: s1 [file s1]

# Fate and Spatial–Temporal Variation of 23 Elements at 7 Wastewater Treatment Plants in Southeast City of China

Shanshan Guo <sup>1,2</sup>, François Nkinahamira <sup>3</sup>, Bob Adyari <sup>1,4</sup>, Yiqing Zhang <sup>1,4</sup>, Anyi Hu <sup>1</sup> and Qian Sun <sup>1,\*</sup>

<sup>1</sup> CAS Key Laboratory of Urban Pollutant Conversion, Institute of Urban Environment, Chinese Academy of Sciences, Xiamen 361021, China

<sup>2</sup> College of Resources and Environment, Fujian Agriculture and Forestry University, Fuzhou 350002, China

<sup>3</sup> State Key Laboratory of Urban Water Resource and Environment, Shenzhen Key Laboratory of Organic Pollution Prevention and Control, School of Civil and Environmental Engineering, Harbin Institute of Technology Shenzhen, Shenzhen 518055, China

<sup>4</sup> University of Chinese Academy of Sciences, Beijing 100049, China

\* Correspondence: qsun@iue.ac.cn; Tel./Fax: +86-592-6190762

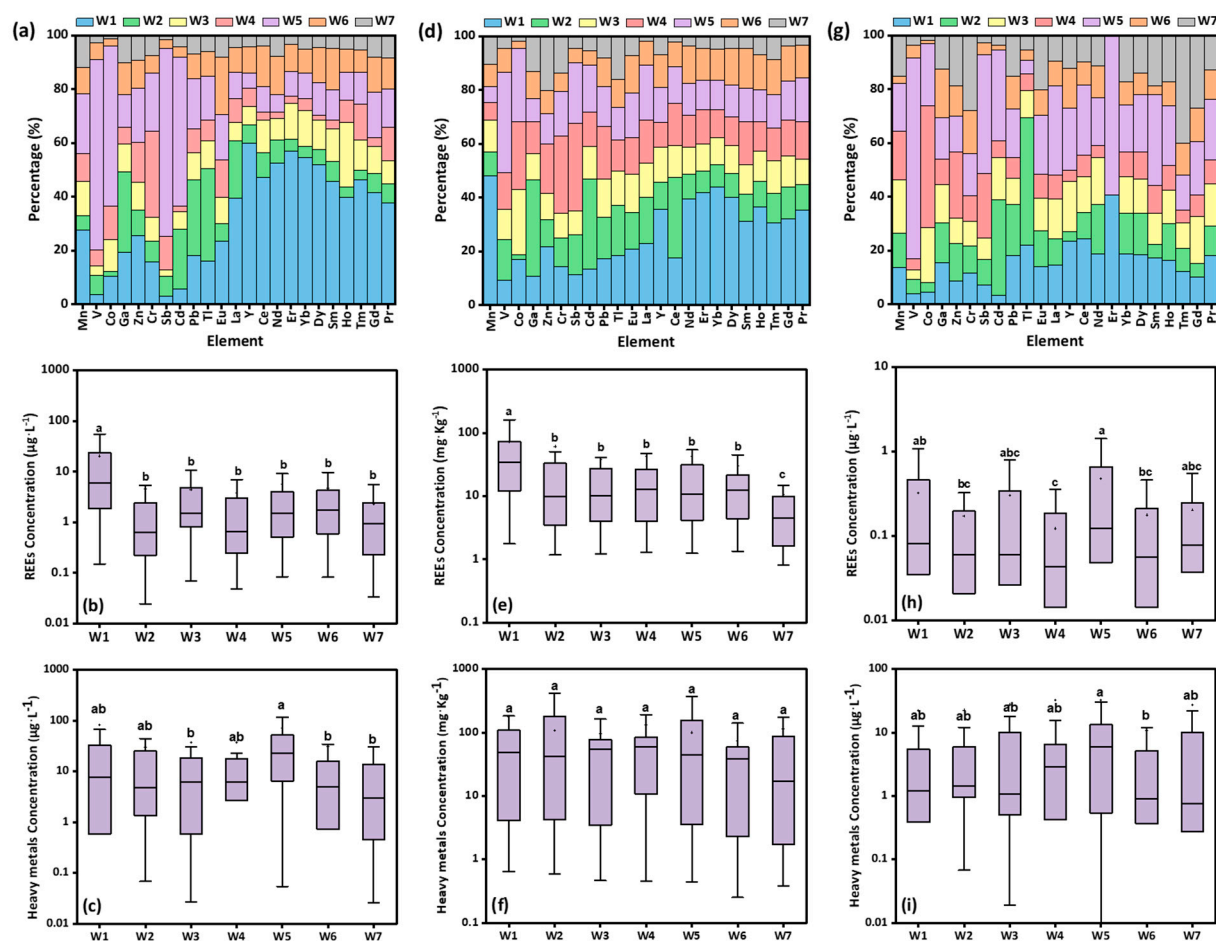

**Figure S1.** Relative percentage of inorganic elements in influent (a-c), sludge (d-f), and effluent (g-i) in 7 WWTPs. Different letters indicate statistically different (Kruskal-Wallis test; Dunn's test,  $p < 0.05$ ).

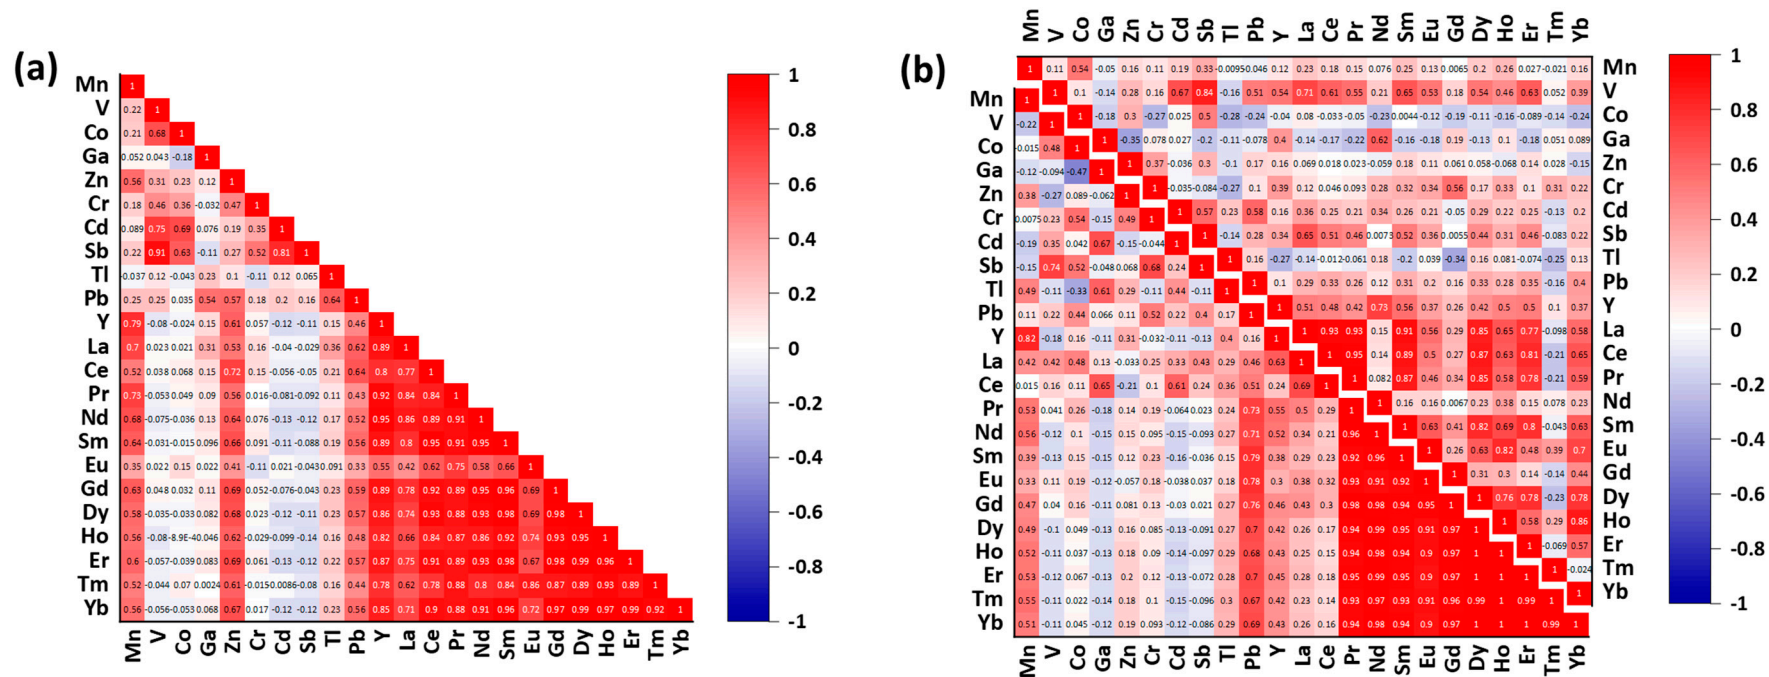

Figure S2. Correlation analysis among elements in influent (a), effluent (upper triangular) and sludge (lower triangular) (b).

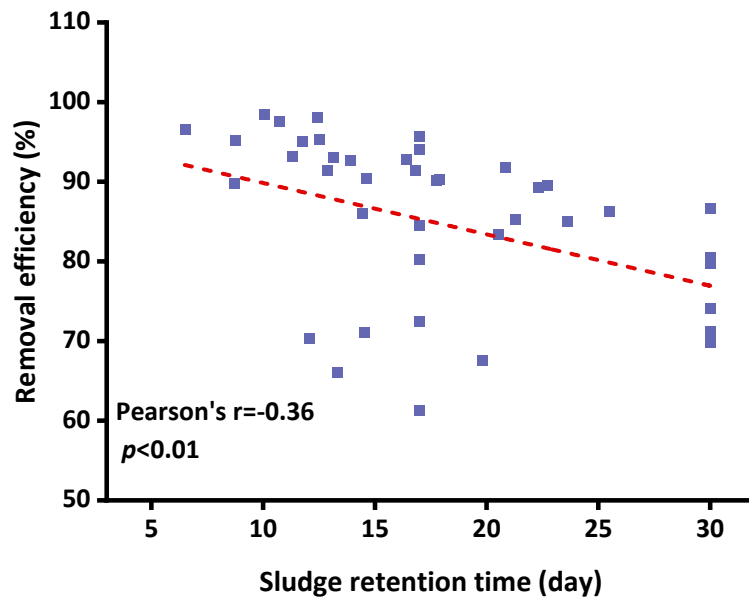

**Figure S3.** Relationship of sludge retention time and elemental removal efficiency in seven WWTPs.

**Table S1.** Performance of each WWTP during the sampling days.

| WWTPs | Treatment process                                                                                       | Performance parameters                                                   | Jun 03 | Jun 05 | Jun 08 | Jan 04 | Jan 06 | Jan 08 |
|-------|---------------------------------------------------------------------------------------------------------|--------------------------------------------------------------------------|--------|--------|--------|--------|--------|--------|
| W1    | primary sedimentation, oxidation ditches, secondary sedimentation, UV disinfection                      | Daily process capacity ( $\times 10^4 \text{ m}^3 \cdot \text{d}^{-1}$ ) | 11.4   | 10.6   | 12.0   | 6.1    | 7.2    | 6.6    |
|       |                                                                                                         | Daily activated sludge production (t)                                    | 248.4  | 256.7  | 240.2  | 265.2  | 252.6  | 249.0  |
|       |                                                                                                         | Daily excess sludge production (t)                                       | 20.6   | 24.9   | 26.9   | 20.7   | 22.7   | 18.3   |
| W2    | primary sedimentation, oxidation ditches, secondary sedimentation, UV disinfection                      | Daily process capacity ( $\times 10^4 \text{ m}^3 \cdot \text{d}^{-1}$ ) | 9.1    | 8.8    | 9.4    | 9.5    | 9.4    | 9.4    |
|       |                                                                                                         | Daily activated sludge production (t)                                    | 111.3  | 106.6  | 108.0  | 128.9  | 144.6  | 139.6  |
|       |                                                                                                         | Daily excess sludge production (t)                                       | 7.7    | 7.2    | 8.5    | 11.2   | 12.2   | 14.7   |
| W3    | primary sedimentation, A <sup>2</sup> /O or oxidation ditches, secondary sedimentation, UV disinfection | Daily process capacity ( $\times 10^4 \text{ m}^3 \cdot \text{d}^{-1}$ ) | 9.2    | 9.8    | 9.8    | 9.2    | 9.0    | 8.5    |
|       |                                                                                                         | Daily activated sludge production (t)                                    | 457.1  | 455.4  | 438.8  | 546.2  | 555.8  | 556.8  |
|       |                                                                                                         | Daily excess sludge production (t)                                       | 16.3   | 17.4   | 11.8   | 18.1   | 19.5   | 16.4   |
| W4    | primary sedimentation, A <sup>2</sup> /O, secondary sedimentation, chemical disinfection                | Daily process capacity ( $\times 10^4 \text{ m}^3 \cdot \text{d}^{-1}$ ) | 8.4    | 8.3    | 9.1    | 9.8    | 10.1   | 10.0   |
|       |                                                                                                         | Daily activated sludge production (t)                                    | 295.3  | 295.3  | 295.3  | 452.2  | 381.2  | 385.5  |
|       |                                                                                                         | Daily excess sludge production (t)                                       | 170.6  | 172.6  | 184.0  | 163.3  | 157.2  | 179.4  |
| W5    | primary sedimentation, A <sup>2</sup> /O, secondary sedimentation, UV disinfection                      | Daily process capacity ( $\times 10^4 \text{ m}^3 \cdot \text{d}^{-1}$ ) | 11.2   | 11.3   | 11.5   | 13.8   | 13.9   | 13.7   |
|       |                                                                                                         | Daily activated sludge production (t)                                    | 699.7  | 691.3  | 668.7  | 1215.9 | 1065.0 | 1091.6 |
|       |                                                                                                         | Daily excess sludge production (t)                                       | 20.3   | 23.6   | 23.1   | 23.5   | 30.3   | 35.4   |
| W6    | primary sedimentation, oxidation ditches, secondary sedimentation, UV disinfection                      | Daily process capacity ( $\times 10^4 \text{ m}^3 \cdot \text{d}^{-1}$ ) | 24.1   | 23.3   | 23.7   | 23.9   | 24.5   | 25.7   |
|       |                                                                                                         | Daily activated sludge production (t)                                    | 602.7  | 574.6  | 568.9  | 640.9  | 606.3  | 538.8  |
|       |                                                                                                         | Daily excess sludge production (t)                                       | 59.1   | 50.1   | 51.8   | 40.1   | 62.2   | 38.3   |
| W7    | primary sedimentation, biological aerated filters (BAF), UV disinfection                                | Daily process capacity ( $\times 10^4 \text{ m}^3 \cdot \text{d}^{-1}$ ) | 22.9   | 22.9   | 24.4   | 28.4   | 29.3   | 27.1   |
|       |                                                                                                         | Daily activated sludge production (t)                                    | ND     | ND     | ND     | ND     | ND     | ND     |
|       |                                                                                                         | Daily excess sludge production (t)                                       | ND     | ND     | ND     | ND     | ND     | ND     |

ND: no excess sludge was discharged during sampling day.

**Table S2.** Elemental recoveries and analytical standard deviations in aqueous and sludge (n =3).

| Elements | Liquor       |         |                                       | Sludge       |         |                                       |
|----------|--------------|---------|---------------------------------------|--------------|---------|---------------------------------------|
|          | Recovery (%) | RSD (%) | DL( $\mu\text{g}\cdot\text{L}^{-1}$ ) | Recovery (%) | RSD (%) | DL ( $\text{mg}\cdot\text{Kg}^{-1}$ ) |
| Mn       | 116.08       | 3.15    | $3.93\times 10^{-2}$                  | 70.92        | 0.08    | $1.21\times 10^1$                     |
| V        | 114.78       | 1.63    | $9.20\times 10^{-1}$                  | 76.29        | 1.25    | $2.63\times 10^1$                     |
| Co       | 107.76       | 1.11    | $7.27\times 10^{-2}$                  | 73.26        | 0.45    | 3.53                                  |
| Ga       | 109.67       | 1.39    | $7.11\times 10^{-2}$                  | 68.87        | 7.66    | 3.43                                  |
| Cr       | 108.56       | 3.51    | 3.52                                  | 92.02        | 3.77    | $1.35\times 10^2$                     |
| Zn       | 107.05       | 4.83    | $1.44\times 10^{-1}$                  | 86.96        | 0.89    | $5.07\times 10^2$                     |
| Cd       | 100.38       | 1.19    | $3.81\times 10^{-1}$                  | 91.55        | 2.70    | 4.44                                  |
| Sb       | 114.77       | 2.05    | $4.40\times 10^{-2}$                  | 82.45        | 7.40    | 6.57                                  |
| Tl       | 106.84       | 2.32    | $4.00\times 10^{-3}$                  | 71.53        | 3.12    | 1.80                                  |
| Pb       | 99.19        | 2.28    | $8.29\times 10^{-3}$                  | 97.55        | 0.43    | $1.66\times 10^1$                     |
| Y        | 115.76       | 0.94    | $2.13\times 10^{-3}$                  | 64.53        | 6.38    | 1.33                                  |
| La       | 111.73       | 1.11    | $3.32\times 10^{-3}$                  | 112.58       | 5.59    | 1.10                                  |
| Ce       | 112.75       | 1.18    | $2.87\times 10^{-3}$                  | 112.99       | 5.51    | 4.71                                  |
| Pr       | 113.06       | 1.24    | $3.69\times 10^{-3}$                  | 122.43       | 4.76    | 5.11                                  |
| Nd       | 114.08       | 0.71    | $1.10\times 10^{-2}$                  | 126.65       | 2.39    | 4.38                                  |
| Sm       | 114.97       | 0.99    | $1.84\times 10^{-2}$                  | 118.55       | 5.84    | 2.75                                  |
| Eu       | 124.16       | 0.84    | $3.03\times 10^{-3}$                  | 100.03       | 0.73    | 1.32                                  |
| Gd       | 113.37       | 0.89    | $2.81\times 10^{-3}$                  | 120.03       | 1.72    | 2.73                                  |
| Dy       | 114.79       | 0.73    | $6.40\times 10^{-3}$                  | 107.78       | 4.13    | 3.40                                  |
| Ho       | 115.59       | 0.66    | $1.54\times 10^{-3}$                  | 97.04        | 3.81    | $4.92\times 10^{-1}$                  |
| Er       | 114.75       | 0.81    | $5.75\times 10^{-3}$                  | 93.77        | 4.23    | 6.44                                  |
| Tm       | 115.88       | 0.68    | $1.13\times 10^{-3}$                  | 98.20        | 3.80    | $3.50\times 10^{-1}$                  |
| Yb       | 113.95       | 0.70    | $2.67\times 10^{-3}$                  | 95.40        | 4.27    | 4.06                                  |

**Table S3.** Median concentrations of target elements, unit:  $\mu\text{g}\cdot\text{L}^{-1}$ .

| Country               | Zn    | Cr   | Cd    | Pb    | Reference |
|-----------------------|-------|------|-------|-------|-----------|
| <b>Influent</b>       |       |      |       |       |           |
| Southeast City, China | 142   | 22.0 | 0.29  | 7.50  | This work |
| Chongqing, China      | 109.1 | -    | 1.22  | 18.2  | [1]       |
| Shanghai, China       | 358   | 46.0 | 0.12  | 2.00  | [2]       |
| Ostrava               | 181   | 2.76 | 1.00  | 5.00  | [3]       |
| Norway                | 119.1 | 2.96 | 0.19  | 3.17  | [4]       |
| Italy                 | 833   | 5.80 | 0.60  | 13.3  | [5]       |
| <b>Effluent</b>       |       |      |       |       |           |
| Southeast City, China | 72.4  | 7.91 | 0.146 | 0.991 | This work |
| GB 18918-2002         | 1000  | 100  | 10    | 100   | [6]       |
| <b>Sludge</b>         |       |      |       |       |           |
| Southeast City, China | 309   | 296  | 1.65  | 56.9  | This work |
| 48 cities, China      | 1058  | 93.1 | 2.01  | 72.3  | [7]       |

**Table S4.** Median value of removal efficiency of target elements, unit:  $\mu\text{g}\cdot\text{L}^{-1}$ .

| Element | W1                 | W2                  | W3                  | W4                  | W 5                 | W6                  | W7                 |
|---------|--------------------|---------------------|---------------------|---------------------|---------------------|---------------------|--------------------|
| Pb      | 87.71              | 89.97               | 90.80               | 92.46               | 90.89               | 85.88               | 76.19              |
| V       | 86.50              | 84.36               | 81.72               | 84.35               | 79.06               | 90.50               | 82.21              |
| Cr      | 82.62              | 55.92               | 63.00               | 87.25               | 78.96               | 54.07               | -15.49             |
| Ga      | 69.92              | 83.34               | 65.40               | 63.30               | 62.75               | 60.07               | 60.23              |
| Cd      | 83.10              | 48.20               | 18.80               | 15.84               | 79.79               | 81.94               | 74.47              |
| Zn      | 85.00              | 20.25               | 59.60               | 23.28               | 69.64               | 48.66               | 7.72               |
| Tl      | 3.73               | 25.76               | 21.43               | 42.02               | 76.49               | 73.85               | 44.96              |
| Sb      | -11.97             | 45.18               | -44.76              | 31.27               | 75.14               | 34.00               | 39.84              |
| Co      | 77.30              | -21.23              | -31.11              | -135.61             | 75.30               | 59.38               | 6.63               |
| Mn      | 66.82              | -83.47              | -5.87               | -28.10              | 34.45               | 81.98               | -3.90              |
| Y       | 97.51              | 95.66               | 86.31               | 97.03               | 75.37               | 92.63               | 79.72              |
| La      | 99.09              | 98.95               | 95.58               | 98.29               | 93.68               | 98.09               | 95.22              |
| Ce      | 98.46              | 56.35               | 96.33               | 79.42               | 94.62               | 98.24               | 94.57              |
| Pr      | 98.80              | 95.92               | 95.16               | 98.07               | 95.79               | 98.26               | 97.19              |
| Nd      | 97.79              | 80.44               | 81.91               | 87.01               | 86.24               | 93.34               | 88.13              |
| Sm      | 98.89              | 98.82               | 96.93               | 96.31               | 94.54               | 99.54               | 91.11              |
| Eu      | 95.99              | 79.46               | 88.08               | 94.60               | 90.76               | 96.43               | 79.59              |
| Gd      | 97.78              | 93.75               | 86.73               | 83.65               | 86.34               | 88.68               | 64.12              |
| Dy      | 98.81              | 89.22               | 96.45               | 88.65               | 93.57               | 98.33               | 87.72              |
| Ho      | 98.07              | 80.50               | 97.75               | 96.70               | 91.89               | 97.19               | 84.76              |
| Er      | 99.39              | 100.00              | 100.00              | 100.00              | 96.62               | 100.00              | 100.00             |
| Tm      | 96.61              | 68.13               | 87.58               | 95.95               | 88.03               | 86.18               | 43.63              |
| Yb      | 97.99              | 76.71               | 95.50               | 92.08               | 87.75               | 96.98               | 81.24              |
| Total   | 96.61 <sup>a</sup> | 80.43 <sup>ab</sup> | 86.72 <sup>ab</sup> | 87.24 <sup>ab</sup> | 90.27 <sup>ab</sup> | 90.49 <sup>ab</sup> | 79.59 <sup>b</sup> |

Note: a and b: different letters are statistically different (Kruskal–Wallis test; Dunn's test,  $p < 0.05$ ).

## References

1. Xie, Y.; Zhang T.; Xu C.L.; Hui Y.F.; Ou Yang W.J. Study on Variation Trends of Heavy Metals Contents in Process of Sludge Energy Utilization. *Advanced Materials Research*. **2013**, 610-613, 198-202.
2. Feng, J.; Jia L.; Liu Q.Z.; Chen X.L.; Cheng J.P. Source identification of heavy metals in sewage sludge and the effect of influent characteristics: a case study from China. *Urban Water Journal*. **2018**, 15, 1-7.
3. Drozdova, J.; Raclavska H.; Raclavsky K.; Skrobankova H. Heavy metals in domestic wastewater with respect to urban population in Ostrava, Czech Republic. *Water and Environment Journal*. **2019**, 33 (1), 77-85.
4. Farkas, J.; Polesel F.; Kjos M.; Carvalho P.A.; Ciesielski T.; Flores-Alsina X.; Hansen S.F.; Booth A.M. Monitoring and modelling of influent patterns, phase distribution and removal of 20 elements in two primary wastewater treatment plants in Norway. *Science of The Total Environment*. **2020**, 725, 138420.
5. Busetti, F.; Badoer S.; Cuomo M.; Rubino B.; Traverso P. Occurrence and Removal of Potentially Toxic Metals and Heavy Metals in the Wastewater Treatment Plant of Fusina (Venice, Italy). *Industrial & Engineering Chemistry Research*. **2005**, 44 (24), 9264-9272.
6. Ministry of Environmental Protection of the People's Republic of China (MOEP). Discharge Standard of Pollutants for Municipal Wastewater Treatment Plant (GB18918-2002). Beijing, China, 2002. (In Chinese)
7. Yang, J.; Lei M.; Chen T.; Gao D.; Zheng G.; Guo G.; Lee D. Current status and developing trends of the contents of heavy metals in sewage sludges in China. *Frontiers of Environmental Science & Engineering*. **2014**, 8 (5), 719-728.
